# Supplementary material for: Metabolic Reconstruction and Modeling of Nitrogen Fixation in Rhizobium etli
Source: PLOS journal article supplement (doi:10.1371/journal.pcbi.0030192), 2007-09-28
Supplement: S2 (10.1371/journal.pcbi.0030192.s002) [file journal.pcbi.0030192.s002]

| **Exchange Flux** | **LB** | **UB** |
| --- | --- | --- |
| L-Alanine | 0 | ∞ |
| L-Aspartate | 0 | ∞ |
| L-Arginine | -5 | 0 |
| Co2 | -∞ | ∞ |
| Phosphate | -∞ | ∞ |
| Glutamate | -20 | ∞ |
| Hydrogen | -∞ | ∞ |
| Inositol | -0.01 | 0 |
| Nitrogen | -∞ | ∞ |
| Ornithine | -∞ | ∞ |
| Oxygen | -1 | 0 |
| Phosphate | -∞ | ∞ |
| Succinate | -∞ | 0 |
| H20 | -∞ | ∞ |
